# Supplementary material for: Metabolic Aspects of Migraine: Association With Obesity and Diabetes Mellitus
Source: PubMed Central journal article supplement (PMC8219973; doi:10.3389/fneur.2021.686398), 2021-06-09
Supplement: Data_Sheet_1.pdf [file Data_Sheet_1.pdf]

## Appendix 1.

Search strategy narrative review performed on 4<sup>th</sup> of January 2021

| Database searched                              | Via              | Years of coverage | Records    | Records after duplicates removed |
|------------------------------------------------|------------------|-------------------|------------|----------------------------------|
| Embase                                         | Embase.com       | 1971 - Present    | 274        | 269                              |
| Medline ALL                                    | Ovid             | 1946 - Present    | 188        | 30                               |
| Web of Science Core Collection                 | Web of Knowledge | 1975 - Present    | 114        | 6                                |
| Cochrane Central Register of Controlled Trials | Wiley            | 1992 - Present    | 25         | 17                               |
| Other sources: Google Scholar (50 top-ranked)  |                  |                   | 19         | 14                               |
| <b>Total</b>                                   |                  |                   | <b>620</b> | <b>336</b>                       |

### Embase

('migraine'/exp/mj OR 'primary headache'/exp/mj OR ('calcitonin gene related peptide'/mj AND ('migraine'/exp OR 'primary headache'/exp)) OR (((CGRP OR CGRPs OR calcitonin-gene-related-peptide\*):ti,kw AND (migrain\* OR primary-headache\*)):ti,ab,kw) OR (migrain\* OR primary-headache\*):ti,kw)) AND ('obesity'/exp/mj OR 'diabetes mellitus'/exp/mj OR 'hyperglycemia'/de/mj OR 'insulin resistance'/de/mj OR 'insulin metabolism'/exp/mj OR 'body mass'/mj OR 'metabolic syndrome X'/exp/mj OR (obesit\* OR obese OR adiposit\* OR adipositas OR over-weight\* OR overweight\* OR ((excess\* OR high\*) NEAR/3 (body) NEAR/3 (weight\*)) OR ((diabet\*) NOT (insipid\*)) OR diabetic OR NIDDM OR T2DM OR hyperglycem\* OR ((metaboli\* OR metaboloendocrin\*) NEAR/3 (syndrom\*)) OR insulin-resistan\* OR insulin-metabolism\* OR ((impair\*) NEAR/3 (glycemia\* OR glycaemia\*)) OR body-mass\* OR BMI):ti,kw) NOT ([Conference Abstract]/lim) NOT ('case report'/de OR (case-report\*):ti) AND [ENGLISH]/lim

## Medline

(\*Migraine without Aura/ OR \*Headache Disorders, Primary/ OR (\*Calcitonin Gene-Related Peptide/ AND (Migraine without Aura/ OR Headache Disorders, Primary/)) OR (((CGRP OR CGRPs OR calcitonin-gene-related-peptide\*).ti. AND (migrain\* OR primary-headache\*).ti,ab.)) OR (migrain\* OR primary-headache\*).ti,kf.)) AND (exp \*Obesity/ OR exp \*Diabetes Mellitus/ OR exp \*Hyperglycemia/ OR exp \*Insulin Resistance/ OR \*Body Mass Index/ OR (obesit\* OR obese OR adiposit\* OR adipositas OR over-weight\* OR overweight\* OR ((excess\* OR high\*) ADJ3 (body) ADJ3 (weight\*)) OR ((diabet\*) NOT (insipid\*)) OR diabetic OR NIDDM OR T2DM OR hyperglycem\* OR ((metaboli\* OR metaboloendocrin\*) ADJ3 (syndrom\*)) OR insulin-resistan\* OR insulin-metabolism\* OR ((impair\*) ADJ3 (glycemia\* OR glycaemia\*)) OR body-mass\* OR BMI).ti,kf.) NOT (news OR congres\* OR abstract\* OR book\* OR chapter\* OR dissertation abstract\*).pt. NOT (Case Reports/ OR (case-report\*).ti.) AND english.la.

## Cochrane

(((((CGRP OR CGRPs OR calcitonin NEXT gene NEXT related NEXT peptide\*):ti AND (migrain\* OR primary NEXT headache\*):ti,ab) OR (migrain\* OR primary NEXT headache\*):ti)) AND ((obesit\* OR obese OR adiposit\* OR adipositas OR over NEXT weight\* OR overweight\* OR ((excess\* OR high\*) NEAR/3 (body) NEAR/3 (weight\*)) OR ((diabet\*) NOT (insipid\*)) OR diabetic OR NIDDM OR T2DM OR hyperglycem\* OR ((metaboli\* OR metaboloendocrin\*) NEAR/3 (syndrom\*)) OR insulin NEXT resistan\* OR insulin NEXT metabolism\* OR ((impair\*) NEAR/3 (glycemia\* OR glycaemia\*)) OR body NEXT mass\* OR BMI):ti)

## Web of Science

(((((TI=(CGRP OR CGRPs OR calcitonin-gene-related-peptide\*) AND TS=(migrain\* OR primary-headache\*))) OR TI=(migrain\* OR primary-headache\*))) AND TI=((obesit\* OR obese OR adiposit\* OR adipositas OR over-weight\* OR overweight\* OR ((excess\* OR high\*) NEAR/2 (body) NEAR/2 (weight\*)) OR ((diabet\*) NOT (insipid\*)) OR diabetic OR NIDDM OR T2DM OR hyperglycem\* OR ((metaboli\* OR metaboloendocrin\*) NEAR/2 (syndrom\*)) OR insulin-resistan\* OR insulin-metabolism\* OR ((impair\*) NEAR/2 (glycemia\* OR glycaemia\*)) OR body-mass\* OR BMI))) AND DT=(Article OR Review OR Letter OR Early Access) AND LA=(English)

## Google Scholar (search in title words only)

migraine|'primary headache' obese|obesity|overweight|diabetes|diabetic|'metabolic syndrome'|hyperglycemia|BMI|'body mass'|adiposity|adipositas|T2DM|NIDDM
